# Supplementary material for: Global variability of the human IgG glycome
Source: PubMed Central journal article supplement (PMC7467356; doi:10.18632/aging.103884), 2020-08-12
Supplement: aging-12-103884-s006..pdf [file aging-12-103884-s006..pdf]

**SUPPLEMENTARY TABLES**

**Supplementary Table 15. Description of directly measured subclass-specific Fc IgG glycan traits measured by LC-MS with mass list.**

| Glycan trait <sup>1</sup> |    | IgG1 glycopeptide m/z <sup>3</sup> |                      | IgG2&3 glycopeptide m/z <sup>4</sup> |                      | IgG4 glycopeptide m/z <sup>5</sup> |                      | Glycan trait description                                 | Glycan trait calculation <sup>6</sup>       |
|---------------------------|-------------------------------------------------------------------------------------|------------------------------------|----------------------|--------------------------------------|----------------------|------------------------------------|----------------------|----------------------------------------------------------|---------------------------------------------|
|                           |                                                                                     | [M+2H] <sup>2+</sup>               | [M+3H] <sup>3+</sup> | [M+2H] <sup>2+</sup>                 | [M+3H] <sup>3+</sup> | [M+2H] <sup>2+</sup>               | [M+3H] <sup>3+</sup> |                                                          |                                             |
| G0F                       |    | 1317,527                           | 878,687              | 1301,532                             | 868,024              | 1309,529                           | 873,356              | Fraction of FA2 glycan in total subclass Fc glycans      | <i>G0F/total subclass Fc glycans*100</i>    |
| G1F                       |    | 1398,553                           | 932,705              | 1382,558                             | 922,042              | 1390,556                           | 927,373              | Fraction of FA2G1 glycan in total subclass Fc glycans    | <i>G1F/total subclass Fc glycans*100</i>    |
| G2F                       |    | 1479,58                            | 986,722              | 1463,585                             | 976,059              | 1471,582                           | 981,391              | Fraction of FA2G2 glycan in total subclass Fc glycans    | <i>G2F/total subclass Fc glycans*100</i>    |
| G0FN                      |    | 1419,067                           | 946,38               | 1403,072                             | 935,717              | 1411,069                           | 941,049              | Fraction of FA2B glycan in total subclass Fc glycans     | <i>G0FN/total subclass Fc glycans*100</i>   |
| G1FN                      |    | 1500,093                           | 1000,398             | 1484,098                             | 989,735              | 1492,096                           | 995,066              | Fraction of FA2BG1 glycan in total subclass Fc glycans   | <i>G1FN/total subclass Fc glycans*100</i>   |
| G2FN                      |    | 1581,119                           | 1054,416             | 1565,125                             | 1043,752             | 1573,122                           | 1049,084             | Fraction of FA2BG2 glycan in total subclass Fc glycans   | <i>G2FN/total subclass Fc glycans*100</i>   |
| G1FS1                     |    | 1544,101                           | 1029,737             | 1528,106                             | 1019,073             | 1536,104                           | 1024,405             | Fraction of FA2G1S1 glycan in total subclass Fc glycans  | <i>G1FS1/total subclass Fc glycans*100</i>  |
| G2FS1                     |    | 1625,127                           | 1083,754             | 1609,133                             | 1073,091             | 1617,13                            | 1078,423             | Fraction of FA2G2S1 glycan in total subclass Fc glycans  | <i>G2FS1/total subclass Fc glycans*100</i>  |
| G1FNS1                    |    | 1645,641                           | 1097,430             | 1629,646                             | 1086,767             | 1637,643                           | 1092,098             | Fraction of FA2BG1S1 glycan in total subclass Fc glycans | <i>G1FNS1/total subclass Fc glycans*100</i> |
| G2FNS1                    |    | 1726,667                           | 1151,447             | 1710,672                             | 1140,784             | 1718,67                            | 1146,116             | Fraction of FA2BG2S1 glycan in total subclass Fc glycans | <i>G2FNS1/total subclass Fc glycans*100</i> |
| G0                        |    | 1244,498                           | 830,001              | 1228,503                             | 819,338              | 1236,501                           | 824,67               | Fraction of A2 glycan in total subclass Fc glycans       | <i>G0/total subclass Fc glycans*100</i>     |
| G1                        |    | 1325,524                           | 884,019              | 1309,529                             | 873,356              | 1317,527                           | 878,687              | Fraction of A2G1 glycan in total subclass Fc glycans     | <i>G1/total subclass Fc glycans*100</i>     |
| G2                        |    | 1406,551                           | 938,036              | 1390,556                             | 927,373              | 1398,553                           | 932,705              | Fraction of A2G2 glycan in total subclass Fc glycans     | <i>G2/total subclass Fc glycans*100</i>     |
| G0N                       |    | 1346,038                           | 897,694              | 1330,043                             | 887,031              | 1338,04                            | 892,363              | Fraction of A2B glycan in total subclass Fc glycans      | <i>G0N/total subclass Fc glycans*100</i>    |
| G1N                       |   | 1427,064                           | 951,712              | 1411,069                             | 941,049              | 1419,067                           | 946,38               | Fraction of A2BG1 glycan in total subclass Fc glycans    | <i>G1N/total subclass Fc glycans*100</i>    |
| G2N                       |  | 1508,090                           | 1005,730             | 1492,096                             | 995,066              | 1500,093                           | 1000,398             | Fraction of A2BG2 glycan in total subclass Fc glycans    | <i>G2N/total subclass Fc glycans*100</i>    |
| G1S1                      |  | 1471,072                           | 981,051              | 1455,077                             | 970,387              | 1463,075                           | 975,719              | Fraction of A2G1S1 glycan in total subclass Fc glycans   | <i>G1S1/total subclass Fc glycans*100</i>   |
| G2S1                      |  | 1552,098                           | 1035,068             | 1536,104                             | 1024,405             | 1544,101                           | 1029,737             | Fraction of A2G2S1 glycan in total subclass Fc glycans   | <i>G2S1/total subclass Fc glycans*100</i>   |
| G1NS1                     |  | 1572,612                           | 1048,744             | 1556,617                             | 1038,081             | 1564,614                           | 1043,412             | Fraction of A2BG1S1 glycan in total subclass Fc glycans  | <i>G1NS1/total subclass Fc glycans*100</i>  |
| G2NS1                     |  | 1653,638                           | 1102,761             | 1637,643                             | 1092,098             | 1645,641                           | 1097,43              | Fraction of A2BG2S1 glycan in total subclass Fc glycans  | <i>G2NS1/total subclass Fc glycans*100</i>  |

<sup>1</sup>Glycan composition: N (N-acetylglucosamine), F (fucose), G (galactose) and S (N-acetylneuraminic acid) followed by a number representing the number and type of monosaccharides attached to A2 glycan.

<sup>2</sup>Glycan structures are drawn in GlycoWorkbench version 2. blue square = N-acetylglucosamine, red triangle = fucose, green circle = mannose, yellow circle = galactose, purple diamond = N-acetylneuraminic acid.

<sup>3</sup>IgG1 tryptic peptide sequence carrying glycan: E293EQYNSTYR301

<sup>4</sup>IgG4 tryptic peptide sequence carrying glycan: E293EQFNSTYR301

<sup>5</sup>IgG2&3 tryptic peptide sequence carrying glycan: E293EQFNSTYR301

<sup>6</sup>total subclass Fc glycans = sum of all 20 glycopeptides in one IgG subclass

**Supplementary Table 16. Description of derived subclass-specific Fc IgG glycan traits measured by LC-MS with mass list.**

| <b>Derived glycan trait</b> | <b>Derived trait description</b>                                                   | <b>Derived trait calculation</b>                       |
|-----------------------------|------------------------------------------------------------------------------------|--------------------------------------------------------|
| Core fucosylation           | Fraction of structures containing core fucose in subclass specific Fc glycans      | $G0F+G1F+G2F+G0FN+G1FN+G2FN+G1FS1+G2FS1+G1FNS1+G2FNS1$ |
| Bisecting GlcNAc            | Fraction of structures containing bisecting GlcNAc in subclass specific Fc glycans | $G0FN+G1FN+G2FN+G1FNS1+G2FNS1+G0N+G1N+G2N+G1NS1+G2NS1$ |
| Agalactosylation            | Fraction of agalactosylated structures in subclass specific Fc glycans             | $G0+G0F+G0N+G0FN$                                      |
| Monogalactosylation         | Fraction of structures containing one galactose in subclass specific Fc glycans    | $G1F+G1FN+G1FS1+G1FNS1+G1+G1N+G1S1+G1NS1$              |
| Digalactosylation           | Fraction of structures containing two galactoses in subclass specific Fc glycans   | $G2F+G2FN+G2FS1+G2FNS1+G2+G2N+G2S1+G2NS1$              |
| Sialylation                 | Fraction of structures containing sialic acid in subclass specific Fc glycans      | $G1FS1+G2FS1+G1FNS1+G2FNS1+G1S1+G2S1+G1NS1+G2NS1$      |

**Supplementary Table 17. Correlations between derived glycan traits measured by HILIC-UPLC.**

|                     | <b>Agalactosylation</b> | <b>Monogalactosylation</b> | <b>Digalactosylation</b> | <b>Bisecting GlcNAc</b> | <b>Sialylation</b> | <b>Core fucosylation</b> |
|---------------------|-------------------------|----------------------------|--------------------------|-------------------------|--------------------|--------------------------|
| Agalactosylation    | 1,00                    | -0,23                      | -0,89                    | 0,38                    | -0,70              | 0,17                     |
| Monogalactosylation | -0,23                   | 1,00                       | 0,21                     | -0,07                   | -0,41              | 0,56                     |
| Digalactosylation   | -0,89                   | 0,21                       | 1,00                     | -0,39                   | 0,43               | 0,04                     |
| Bisecting GlcNAc    | 0,38                    | -0,07                      | -0,39                    | 1,00                    | -0,23              | -0,09                    |
| Sialylation         | -0,70                   | -0,41                      | 0,43                     | -0,23                   | 1,00               | -0,63                    |
| Core fucosylation   | 0,17                    | 0,56                       | 0,04                     | -0,09                   | -0,63              | 1,00                     |

**Supplementary Table 18. Correlations between derived subclass-specific Fc IgG glycan traits measured by LC-MS.**

|                          | IgG1_Agalactosylation | IgG1_Monogalactosylation | IgG1_Digalactosylation | IgG1_Sialylation | IgG1_Bisecting | IgG2_Agalactosylation | IgG2_Monogalactosylation | IgG2_Digalactosylation | IgG2_Sialylation | IgG2_Bisecting | IgG4_Agalactosylation | IgG4_Monogalactosylation | IgG4_Digalactosylation | IgG4_Sialylation | IgG4_Bisecting |
|--------------------------|-----------------------|--------------------------|------------------------|------------------|----------------|-----------------------|--------------------------|------------------------|------------------|----------------|-----------------------|--------------------------|------------------------|------------------|----------------|
| IgG1_Agalactosylation    | 1,00                  | -0,64                    | -0,90                  | -0,62            | 0,26           | 0,81                  | -0,63                    | -0,76                  | -0,57            | 0,21           | 0,67                  | -0,39                    | -0,62                  | -0,47            | 0,22           |
| IgG1_Monogalactosylation | -0,64                 | 1,00                     | 0,47                   | -0,09            | 0,00           | -0,42                 | 0,65                     | 0,29                   | 0,08             | -0,02          | -0,33                 | 0,50                     | 0,22                   | 0,02             | -0,06          |
| IgG1_Digalactosylation   | -0,90                 | 0,47                     | 1,00                   | 0,46             | -0,30          | -0,81                 | 0,56                     | 0,87                   | 0,53             | -0,26          | -0,62                 | 0,31                     | 0,67                   | 0,40             | -0,23          |
| IgG1_Sialylation         | -0,62                 | -0,09                    | 0,46                   | 1,00             | -0,26          | -0,51                 | 0,15                     | 0,47                   | 0,62             | -0,17          | -0,50                 | 0,04                     | 0,44                   | 0,60             | -0,19          |
| IgG1_Bisecting           | 0,26                  | 0,00                     | -0,30                  | -0,26            | 1,00           | 0,28                  | -0,15                    | -0,31                  | -0,23            | 0,84           | 0,28                  | -0,12                    | -0,31                  | -0,19            | 0,60           |
| IgG2_Agalactosylation    | 0,81                  | -0,42                    | -0,81                  | -0,51            | 0,28           | 1,00                  | -0,72                    | -0,93                  | -0,77            | 0,28           | 0,61                  | -0,30                    | -0,60                  | -0,46            | 0,24           |
| IgG2_Monogalactosylation | -0,63                 | 0,65                     | 0,56                   | 0,15             | -0,15          | -0,72                 | 1,00                     | 0,56                   | 0,20             | -0,17          | -0,44                 | 0,41                     | 0,39                   | 0,18             | -0,12          |
| IgG2_Digalactosylation   | -0,76                 | 0,29                     | 0,87                   | 0,47             | -0,31          | -0,93                 | 0,56                     | 1,00                   | 0,68             | -0,28          | -0,58                 | 0,23                     | 0,64                   | 0,43             | -0,23          |
| IgG2_Sialylation         | -0,57                 | 0,08                     | 0,53                   | 0,62             | -0,23          | -0,77                 | 0,20                     | 0,68                   | 1,00             | -0,22          | -0,46                 | 0,10                     | 0,42                   | 0,50             | -0,23          |
| IgG2_Bisecting           | 0,21                  | -0,02                    | -0,26                  | -0,17            | 0,84           | 0,28                  | -0,17                    | -0,28                  | -0,22            | 1,00           | 0,23                  | -0,11                    | -0,25                  | -0,15            | 0,58           |
| IgG4_Agalactosylation    | 0,67                  | -0,33                    | -0,62                  | -0,50            | 0,28           | 0,61                  | -0,44                    | -0,58                  | -0,46            | 0,23           | 1,00                  | -0,56                    | -0,91                  | -0,75            | 0,25           |
| IgG4_Monogalactosylation | -0,39                 | 0,50                     | 0,31                   | 0,04             | -0,12          | -0,30                 | 0,41                     | 0,23                   | 0,10             | -0,11          | -0,56                 | 1,00                     | 0,34                   | -0,06            | -0,39          |
| IgG4_Digalactosylation   | -0,62                 | 0,22                     | 0,67                   | 0,44             | -0,31          | -0,60                 | 0,39                     | 0,64                   | 0,42             | -0,25          | -0,91                 | 0,34                     | 1,00                   | 0,69             | -0,19          |
| IgG4_Sialylation         | -0,47                 | 0,02                     | 0,40                   | 0,60             | -0,19          | -0,46                 | 0,18                     | 0,43                   | 0,50             | -0,15          | -0,75                 | -0,06                    | 0,69                   | 1,00             | 0,00           |
| IgG4_Bisecting           | 0,22                  | -0,06                    | -0,23                  | -0,19            | 0,60           | 0,24                  | -0,12                    | -0,23                  | -0,23            | 0,58           | 0,25                  | -0,39                    | -0,19                  | 0,00             | 1,00           |
