# Supplementary material for: Global variability of the human IgG glycome
Source: publisher site journal article supplement (doi:10.18632/aging.103884), 2020-08-12
Supplement: Supplementary file [file aging-v12i15-103884-supplementary-material-SD7.pdf]

## SUPPLEMENTARY TABLES

**Supplementary Table 11. Health-related Sustainable Development Goals (SDG) indicators used for assessment of country development level [65]. Development indicator and short descriptions are given.**

| Health-related SDG indicator                   | Definition                                                                                                                                                             |
|------------------------------------------------|------------------------------------------------------------------------------------------------------------------------------------------------------------------------|
| SDG                                            | Overall health-related SDG index (health-related SDG indicators included)                                                                                              |
| MDG                                            | Overall health-related MDX index (Health-related SDG indicators included in the Millennium Development Goals)                                                          |
| non-MDG                                        | Health-related SDG indicators not included in the Millennium Development Goals                                                                                         |
| Adolescent birth rate                          | Birth rates for women aged 10–14 years and women aged 15–19 years, number of livebirths per 1000 women aged 10–14 years and women aged 15–19 years                     |
| Air pollution mortality                        | Age-standardised death rate attributable to household air pollution and ambient air pollution, per 100 000 population                                                  |
| Alcohol                                        | Risk-weighted prevalence of alcohol consumption, as measured by the SEV for alcohol use, %                                                                             |
| Disaster                                       | Age-standardised death rate due to exposure to forces of nature, per 100 000 population                                                                                |
| Family planning need met, modern contraception | Proportion of women of reproductive age (15–49 years) who have their need for family planning satisfied with modern methods, % women aged 15–49 years                  |
| Hepatitis B                                    | Age-standardised rate of hepatitis B incidence, per 100 000 population                                                                                                 |
| HIV                                            | Age-standardised rate of new HIV infections, per 1000 population                                                                                                       |
| Household air pollution                        | Risk-weighted prevalence of household air pollution, as measured by the SEV for household air pollution, %                                                             |
| Hygiene                                        | Risk-weighted prevalence of populations with unsafe hygiene (no handwashing with soap), as measured by the SEV for unsafe hygiene, %                                   |
| Intimate partner violence                      | Age-standardised prevalence of women aged 15 years and older who experienced intimate partner violence, % women aged 15 years and older                                |
| Malaria                                        | Age-standardised rate of malaria cases, per 1000 population                                                                                                            |
| Maternal mortality ratio                       | Maternal deaths per 100 000 livebirths                                                                                                                                 |
| Mean PM 2.5                                    | Population-weighted mean levels of PM <sub>2.5</sub> , µg/m <sup>3</sup>                                                                                               |
| NCDs                                           | Age-standardised death rate due to cardiovascular disease, cancer, diabetes, and chronic respiratory disease in populations aged 30 - 70 years, per 100 000 population |
| Neglected tropical diseases                    | Age-standardised prevalence of neglected tropical diseases, per 100 000 population                                                                                     |
| Neonatal mortality                             | Probability of dying during the first 28 days of life per 1000 livebirths                                                                                              |
| Occupational risk burden                       | Age-standardised all-cause DAILY rate attributable to occupational risks, per 100 000 population                                                                       |
| Overweight                                     | Prevalence of overweight in children aged 2 - 4 years, %                                                                                                               |
| Poisons                                        | Age-standardised death rate due to unintentional poisonings, per 100 000 population                                                                                    |
| Road injuries                                  | Age-standardised death rate due to road traffic injuries, per 100 000 population                                                                                       |
| Sanitation                                     | Risk-weighted prevalence of populations using unsafe or unimproved sanitation, as measured by the SEV for unsafe sanitation, %                                         |
| Skilled birth attendance                       | Proportion of births attended by skilled health personnel (doctors, nurses, midwives, or country-specific medical staff [e.g., clinical officers]), %                  |
| Smoking                                        | Age-standardised prevalence of daily smoking in populations aged 10 years and older, % population aged 10 years and older                                              |
| Stunting                                       | Prevalence of stunting in achieving, by 2025, the internationally agreed targets on children under age 5 years, %                                                      |
| Suicide                                        | Age-standardised death rate due to self-harm, per 100 000 population                                                                                                   |
| Tuberculosis                                   | Age-standardised rate of new and relapsed tuberculosis cases, per 1000 population                                                                                      |
| Under-5 mortality                              | Probability of dying before age 5 years per 1000 livebirths                                                                                                            |
| Universal health coverage tracer               | Coverage of universal health coverage tracer interventions for prevention and treatment services, %                                                                    |
| Violence                                       | Age-standardised death rate due to interpersonal violence, per 100 000 population                                                                                      |
| War                                            | Age-standardised death rate due to collective violence and legal intervention, per 100 000 population                                                                  |
| WaSH mortality                                 | Age-standardised death rate attributable to unsafe WaSH, per 100 000 population                                                                                        |
| Wasting                                        | Prevalence of wasting in children under age 5 years, %                                                                                                                 |
| Water                                          | Risk-weighted prevalence of populations using unsafe or unimproved water sources, as measured by the SEV for unsafe water, %                                           |

**Supplementary Table 12. United Nation’s Human Development Index (HDI) indicators used for assessment of country development level [66].**

| <b>HDI indicator</b>     | <b>Definition</b>                                                                                                                                                                                        |
|--------------------------|----------------------------------------------------------------------------------------------------------------------------------------------------------------------------------------------------------|
| HDI index                | Composite measure of three life dimensions: life expectancy, per capita income and education                                                                                                             |
| Health index             | Life expectancy at birth in 2014; expressed as an index using a minimum value of 20 years and a maximum value of 85 years                                                                                |
| Life expectancy at birth | Number of years a new-born infant could expect to live if prevailing patterns of age-specific mortality rates at the time of birth stay the same throughout the infant’s life                            |
| Education index          | Education index is an average of mean years of schooling (of adults) and expected years of schooling (of children) in 2014, both expressed as an index obtained by scaling with the corresponding maxima |
| GDP                      | Gross domestic product (GDP) per capita in 2013                                                                                                                                                          |
| Life expectancy - M      | Life expectancy at birth, male (years)                                                                                                                                                                   |
| Life expectancy - F      | Life expectancy at birth, female (years)                                                                                                                                                                 |
| Water (UN)               | Accessibility of drinkable tap water                                                                                                                                                                     |
| Sanitation (UN)          | Accessibility of advanced sanitation                                                                                                                                                                     |

Development indicator and short descriptions are given.

**Supplementary Table 13. Development level of 14 countries expressed through 45 indicators.**

|                        | China | Thailand | Sweden | Germany | England | Scotland | Croatia | Italy | Kosovo | Russia | Turkey | Uganda | Trinidad | Papua |
|------------------------|-------|----------|--------|---------|---------|----------|---------|-------|--------|--------|--------|--------|----------|-------|
| <b>SDG index</b>       | 60    | 56       | 85     | 80      | 82      | 82       | 70      | 78    | 65     | 54     | 58     | 31     | 67       | 36    |
| <b>Disaster</b>        | 39    | 29       | 100    | 100     | 100     | 100      | 100     | 61    | 40     | 57     | 33     | 53     | 100      | 32    |
| <b>Stunting</b>        | 87    | 85       | 100    | 100     | 100     | 100      | 91      | 100   | 91     | 85     | 86     | 55     | 95       | 51    |
| <b>Wasting</b>         | 91    | 84       | 100    | 100     | 100     | 100      | 88      | 100   | 87     | 90     | 96     | 82     | 87       | 86    |
| <b>Overweight</b>      | 62    | 71       | 51     | 47      | 64      | 64       | 46      | 39    | 65     | 46     | 65     | 82     | 81       | 71    |
| <b>MMR</b>             | 62    | 61       | 79     | 71      | 70      | 70       | 71      | 79    | 68     | 61     | 64     | 28     | 46       | 22    |
| <b>SBA</b>             | 97    | 99       | 100    | 100     | 99      | 99       | 99      | 99    | 99     | 99     | 94     | 68     | 100      | 65    |
| <b>Under-5 mort</b>    | 66    | 81       | 94     | 89      | 84      | 84       | 85      | 91    | 75     | 72     | 61     | 32     | 58       | 42    |
| <b>NN mort</b>         | 69    | 80       | 94     | 91      | 85      | 85       | 84      | 90    | 76     | 75     | 59     | 34     | 51       | 47    |
| <b>HIV</b>             | 46    | 34       | 65     | 57      | 51      | 51       | 69      | 54    | 57     | 32     | 64     | 15     | 35       | 35    |
| <b>Tuberculosis</b>    | 45    | 45       | 82     | 86      | 74      | 74       | 69      | 87    | 70     | 41     | 69     | 29     | 62       | 48    |
| <b>Malaria</b>         | 94    | 26       | 100    | 100     | 100     | 100      | 100     | 100   | 100    | 100    | 100    | 5      | 100      | 6     |
| <b>Hepatitis B</b>     | 40    | 33       | 85     | 85      | 85      | 85       | 66      | 82    | 66     | 49     | 43     | 33     | 67       | 21    |
| <b>NTDs</b>            | 89    | 87       | 100    | 100     | 100     | 100      | 100     | 100   | 100    | 99     | 97     | 85     | 98       | 54    |
| <b>NCDs</b>            | 58    | 61       | 87     | 77      | 78      | 78       | 62      | 85    | 54     | 41     | 73     | 46     | 47       | 19    |
| <b>Suicide</b>         | 59    | 42       | 51     | 55      | 64      | 64       | 47      | 71    | 44     | 21     | 81     | 43     | 46       | 42    |
| <b>Alcohol</b>         | 74    | 74       | 57     | 54      | 57      | 57       | 54      | 68    | 59     | 7      | 90     | 58     | 65       | 87    |
| <b>Road injuries</b>   | 49    | 36       | 94     | 88      | 94      | 94       | 72      | 75    | 69     | 53     | 66     | 35     | 55       | 37    |
| <b>FP need met</b>     | 86    | 66       | 91     | 92      | 95      | 95       | 34      | 86    | 37     | 75     | 70     | 41     | 76       | 47    |
| <b>Adol birth rate</b> | 69    | 54       | 84     | 86      | 73      | 73       | 80      | 87    | 70     | 67     | 61     | 24     | 60       | 44    |
| <b>UHC Tracer</b>      | 81    | 69       | 99     | 96      | 100     | 100      | 84      | 97    | 84     | 85     | 82     | 69     | 93       | 45    |
| <b>Air poll mort</b>   | 48    | 61       | 96     | 83      | 83      | 83       | 68      | 83    | 58     | 62     | 71     | 33     | 74       | 28    |
| <b>WaSH mort</b>       | 75    | 49       | 87     | 84      | 77      | 77       | 88      | 96    | 88     | 79     | 76     | 22     | 64       | 21    |
| <b>Poisons</b>         | 50    | 69       | 71     | 94      | 75      | 75       | 84      | 81    | 73     | 47     | 80     | 37     | 71       | 44    |
| <b>Smoking</b>         | 52    | 60       | 75     | 46      | 55      | 55       | 32      | 52    | 43     | 41     | 47     | 87     | 68       | 36    |
| <b>IPV</b>             | 96    | 57       | 80     | 70      | 80      | 80       | 91      | 66    | 82     | 64     | 53     | 18     | 73       | 69    |
| <b>Water</b>           | 500   | 34       | 100    | 100     | 100     | 100      | 81      | 100   | 74     | 86     | 29     | 26     | 47       | 14    |
| <b>Sanitation</b>      | 66    | 98       | 100    | 100     | 100     | 100      | 97      | 100   | 85     | 79     | 87     | 20     | 90       | 20    |
| <b>Hygiene</b>         | 38    | 46       | 95     | 89      | 93      | 93       | 43      | 86    | 43     | 69     | 28     | 3      | 53       | 16    |
| <b>HH air poll</b>     | 79    | 88       | 100    | 100     | 100     | 100      | 94      | 100   | 78     | 98     | 98     | 2      | 100      | 55    |
| <b>Occ risk burden</b> | 43    | 54       | 81     | 71      | 74      | 74       | 63      | 72    | 60     | 67     | 57     | 31     | 73       | 9     |
| <b>Mean PM 2.5</b>     | 25    | 46       | 81     | 62      | 65      | 65       | 51      | 53    | 51     | 58     | 37     | 24     | 62       | 62    |
| <b>Violence</b>        | 69    | 34       | 74     | 81      | 86      | 86       | 72      | 77    | 55     | 25     | 58     | 39     | 19       | 36    |
| <b>War</b>             | 100   | 100      | 100    | 100     | 100     | 100      | 100     | 100   | 100    | 31     | 19     | 100    | 100      | 100   |
| <b>MDG index</b>       | 70    | 63       | 94     | 92      | 90      | 90       | 80      | 92    | 76     | 75     | 67     | 33     | 69       | 33    |
| <b>Non-MDG index</b>   | 55    | 54       | 80     | 73      | 78      | 78       | 64      | 70    | 60     | 46     | 54     | 29     | 67       | 37    |
| <b>HDI index</b>       | 73    | 73       | 91     | 92      | 91      | 91       | 82      | 87    | 77     | 80     | 76     | 48     | 77       | 51    |
| <b>Life exp</b>        | 76    | 74       | 82     | 81      | 81      | 81       | 77      | 83    | 75     | 70     | 75     | 59     | 70       | 63    |
| <b>Life exp F</b>      | 78    | 78       | 84     | 83      | 83      | 83       | 81      | 86    | 78     | 76     | 79     | 61     | 74       | 65    |
| <b>Life exp M</b>      | 75    | 71       | 81     | 79      | 79      | 79       | 74      | 81    | 72     | 65     | 72     | 57     | 67       | 61    |
| <b>GDP</b>             | 11525 | 13932    | 43741  | 43207   | 37017   | 37017    | 20063   | 34167 | 12893  | 23564  | 18660  | 1368   | 29469    | 2458  |

|                        |    |    |     |     |     |     |     |     |    |    |     |    |    |    |
|------------------------|----|----|-----|-----|-----|-----|-----|-----|----|----|-----|----|----|----|
| <b>Education index</b> | 61 | 62 | 84  | 89  | 89  | 89  | 78  | 78  | 75 | 81 | 66  | 45 | 71 | 41 |
| <b>Health Index</b>    | 86 | 84 | 96  | 94  | 93  | 93  | 88  | 97  | 85 | 77 | 85  | 59 | 78 | 66 |
| <b>Water (UN)</b>      | 96 | 98 | 100 | 100 | 100 | 100 | 100 | 100 | 99 | 97 | 100 | 79 | 95 | 40 |
| <b>Sanitation (UN)</b> | 77 | 93 | 99  | 99  | 99  | 99  | 97  | 100 | 96 | 72 | 95  | 19 | 92 | 19 |

Higher indicator value suggests better conditions impacting on human well-being in a given country. Indicator descriptions are given in Supplementary Tables 11 and 12.

\*MMR = maternal mortality ratio; SBA = skilled birth attendance; Under-5 mort = Under-5 mortality; NN mort = neonatal mortality; NTDs = neglected tropical diseases; NCDs = non-communicable diseases; FP need met = family planning need met, modern contraception; Adol birth rate = adolescent birth rate; UHC = universal health coverage; Air poll mort = air pollution mortality; WaSH Mort = water, sanitation, and hygiene mortality; IPV = intimate partner violence; HH air poll = household air pollution; MDG index = Millennium Development Goals Index; non-MDG index = health-related Sustainable Development Goals not included in MDG; HDI = Human Development Index; Life exp = Life expectancy at birth; Life exp F = Life expectancy – F; Life exp M = Life expectancy – M.
